# Supplementary material for: Extracellular vesicles derived from microRNA-150-5p-overexpressing mesenchymal stem cells protect rat hearts against ischemia/reperfusion
Source: PubMed Central journal article supplement (PMC7377831; doi:10.18632/aging.102792), 2020-07-13
Supplement: aging-12-102792-s001..pdf [file aging-12-102792-s001..pdf]

## SUPPLEMENTARY FIGURE

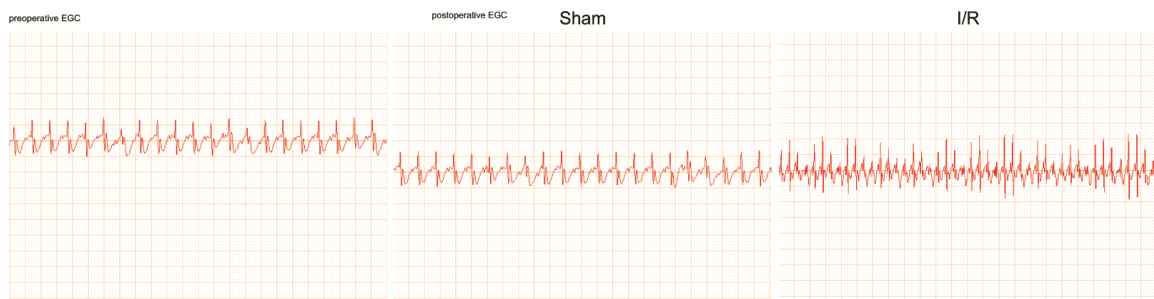

**Supplementary Figure 1. Preoperative and postoperative electrocardiogram of sham-operated rats and rats with I/R.**
